# Supplementary material for: Fetal Alcohol-Related Postnatal Growth Restriction Is Independent of Infant Feeding Practices and Postnatal Alcohol Exposure in a Prospective South African Birth Cohort
Source: MDPI journal article supplement (doi:10.3390/nu15092018), 2023-04-22
Supplement: s1 [file s1]

Supplementary Materials for:

**Fetal alcohol growth restriction is independent of infant feeding practices and postnatal alcohol exposure in a prospective South African birth cohort**

Alexia C. Edwards, Sandra W. Jacobson, Marjanne Senekal, Neil C. Dodge, Christopher D. Molteno, Ernesta M. Meintjes, Joseph L. Jacobson, R. Colin Carter

**Table S1. Univariate relations between control variables and infant feeding practices<sup>a</sup>**

|                                     | Maternal<br>age   | Gravidity | Maternal<br>education | Cigarettes/<br>day | Days/mo<br>marijuana<br>use | Days/mo<br>metham-<br>phetamine<br>use | Weeks<br>gestation<br>at delivery | Infant<br>sex |
|-------------------------------------|-------------------|-----------|-----------------------|--------------------|-----------------------------|----------------------------------------|-----------------------------------|---------------|
| <u>Infant feeding practices</u>     |                   |           |                       |                    |                             |                                        |                                   |               |
| Weeks breastfed                     | 0.06              | 0.01      | 0.04                  | -0.08              | -0.03                       | -0.01                                  | -0.16 <sup>†</sup>                | 0.09          |
| Weeks formula fed                   | -0.01             | -0.03     | -0.15 <sup>†</sup>    | 0.04               | -0.06                       | 0.01                                   | 0.03                              | -0.06         |
| Weeks complementary foods           | -0.08             | -0.12     | 0.12                  | -0.18 <sup>*</sup> | -0.05                       | 0.02                                   | 0.04                              | -0.03         |
| Weeks exclusively breastfed         | 0.00              | 0.04      | 0.15 <sup>†</sup>     | -0.04              | 0.08                        | 0.03                                   | -0.12                             | 0.04          |
| Weeks exclusively formula fed       | -0.06             | -0.02     | -0.01                 | 0.07               | 0.07                        | 0.04                                   | 0.08                              | -0.09         |
| Weeks mixed feeding                 | 0.04              | -0.04     | -0.13                 | -0.02              | -0.11                       | -0.03                                  | 0.01                              | 0.03          |
| Reporting insufficient breastmilk   | -0.09             | -0.08     | -0.11                 | 0.07               | -0.05                       | 0.14                                   | -0.08                             | -0.03         |
| <u>Complementary food provision</u> |                   |           |                       |                    |                             |                                        |                                   |               |
| Juice                               | -0.09             | -0.08     | 0.03                  | 0.031              | -0.02                       | -0.07                                  | 0.06                              | 0.01          |
| Porridge                            | 0.04              | 0.10      | -0.14                 | -0.04              | -0.08                       | -0.01                                  | -0.08                             | -0.13         |
| Fruits                              | -0.04             | -0.03     | -0.01                 | -0.11              | 0.05                        | 0.01                                   | 0.03                              | 0.02          |
| Vegetables                          | -0.01             | -0.06     | -0.04                 | -0.21 <sup>*</sup> | -0.09                       | 0.09                                   | 0.14                              | -0.03         |
| Eggs                                | 0.04              | 0.13      | -0.01                 | 0.06               | -0.04                       | -0.11                                  | -0.11                             | 0.01          |
| Chicken                             | 0.17 <sup>†</sup> | 0.14      | -0.15 <sup>†</sup>    | -0.05              | -0.08                       | -0.04                                  | -0.07                             | -0.11         |
| Fries                               | -0.05             | -0.09     | -0.07                 | -0.02              | 0.07                        | -0.01                                  | 0.00                              | 0.11          |

<sup>†</sup> $p < 0.10$ ; <sup>\*</sup> $p < 0.05$ ; <sup>\*\*</sup> $p < 0.01$ ; <sup>\*\*\*</sup> $p < 0.001$ .

<sup>a</sup>Values are Pearson  $r$ 's
